# Supplementary material for: The Role of Intercellular Signaling in the Regulation of Bacterial Adaptive Proliferation
Source: MDPI journal article supplement (doi:10.3390/ijms24087266), 2023-04-14
Supplement: s1 [file s1]

**Table S1.** Bacterial strains, plasmids and primers used in this study.

| Name                                                             | Description                                                                                                                                                                                                                                             | Origin          |
|------------------------------------------------------------------|---------------------------------------------------------------------------------------------------------------------------------------------------------------------------------------------------------------------------------------------------------|-----------------|
| <b>Strain</b>                                                    |                                                                                                                                                                                                                                                         |                 |
| <i>Pectobacterium atrosepticum</i> SCRI1043 ( <i>Pba</i> )       | Wild type                                                                                                                                                                                                                                               | [1]             |
| <i>Pectobacterium atrosepticum</i> SCRI1043 $\Delta$ <i>expI</i> | Mutant strain of SCRI1043 containing the kanamycin cassette in the chromosome;<br><i>Km<sup>R</sup></i>                                                                                                                                                 | This study      |
| <i>Pectobacterium atrosepticum</i> SCRI1043 $\Delta$ <i>luxS</i> | Mutant strain of SCRI1043 containing the kanamycin cassette in the chromosome;<br><i>Km<sup>R</sup></i>                                                                                                                                                 | This study      |
| <i>Escherichia coli</i> cc118                                    | Host for suicidal vector pKNG101;<br>$\Delta$ ( <i>ara</i> , <i>leu</i> ) <i>araD</i> $\Delta$ <i>lacX</i> 74 <i>galE</i> <i>galK</i> <i>PhoA20</i> <i>thi-1</i> <i>rpsE</i> <i>rpoB</i> <i>argE</i> ( <i>am</i> ) <i>recA1</i> , <i>Sm<sup>R</sup></i> | [2]             |
| <i>Escherichia coli</i> HH26/pNJ5000                             | Mobilizing strain for conjugative transfer of the suicide vector pKNG101 into <i>Pba</i> cells;<br><i>tra+</i> ; <i>Tet<sup>R</sup></i>                                                                                                                 | [3]             |
| <i>Escherichia coli</i> NovaBlue                                 | <i>endA</i> <i>1hsdR17</i> ( <i>rK12-mK12+</i> ) <i>supE44</i> <i>thi-1</i> <i>recA1</i> <i>gyrA96</i> <i>relA1</i> <i>lacF'</i> [ <i>proA+</i> <i>B+</i> <i>lacIqZ</i> $\Delta$ M15:: <i>Tn10</i> ( <i>Tet<sup>R</sup></i> )]                          | Novagen         |
| <i>Pantoea ananatis</i> LMG 20103                                | Wild type                                                                                                                                                                                                                                               | [4]             |
| <i>Dickeya solani</i> DSM28711                                   | Wild type                                                                                                                                                                                                                                               | [5]             |
| <i>Xanthomonas vesicatoria</i> DSM 22252                         | Wild type                                                                                                                                                                                                                                               | [6]             |
| <i>Escherichia coli</i> K-12 MG1655                              | Wild type                                                                                                                                                                                                                                               | NCBI:txid511145 |
| <i>Pseudomonas syringae</i> DC3000                               | Wild type                                                                                                                                                                                                                                               | [7]             |
| <i>Bacillus subtilis</i> DSM10                                   | Wild type                                                                                                                                                                                                                                               | [8]             |
| <i>E. coli</i> JLD271                                            | Host for the bioluminescence reporter vector pAL103 or pAL104 as a negative control;<br><i>WM54 sdiA271::cam</i>                                                                                                                                        | [9]             |
| <i>Vibrio harveyi</i> BB170                                      | Strain was used as a sensor AI-2;<br><i>luxN::Tn5</i>                                                                                                                                                                                                   | [10]            |
| <i>Vibrio harveyi</i> BB152                                      | Strain was used as a positive control;<br><i>luxI::Tn5</i>                                                                                                                                                                                              | [10]            |
| <b>Plasmids</b>                                                  |                                                                                                                                                                                                                                                         |                 |
| pGEM-T Easy                                                      | Linearized vector for cloning;<br><i>f1 ori Amp<sup>R</sup> lacZ</i>                                                                                                                                                                                    | Promega         |
| pGEM: <i>expI</i>                                                | <i>f1 ori Amp<sup>R</sup> lacZ expI</i>                                                                                                                                                                                                                 | This study      |
| pGEM: <i>luxS</i>                                                | <i>f1 ori Amp<sup>R</sup> lacZ luxS</i>                                                                                                                                                                                                                 | This study      |
| pGEM: $\Delta$ <i>expI</i> ;Km <sup>R</sup>                      | <i>f1 ori Amp<sup>R</sup> lacZ Km<sup>R</sup></i>                                                                                                                                                                                                       | This study      |
| pGEM: $\Delta$ <i>luxS</i> ;Km <sup>R</sup>                      | <i>f1 ori Amp<sup>R</sup> lacZ Km<sup>R</sup></i>                                                                                                                                                                                                       | This study      |
| pKD4                                                             | Matrix for PCR amplification of kanamycin resistance cassette;<br><i>oriR<math>\gamma</math> rgnB bla Km<sup>R</sup></i>                                                                                                                                | [11]            |
| pKNG101                                                          | Suicide mobilized vector for inactivation of target genes;<br><i>pir-ori R6K mobRK2 sacB Sm<sup>R</sup></i>                                                                                                                                             | [12]            |
| pKNG101: $\Delta$ <i>expI</i> ;Km <sup>R</sup>                   | Suicide plasmid carrying mutant locus $\Delta$ <i>expI</i> ;Km <sup>R</sup> ;<br><i>Km<sup>R</sup> Sm<sup>R</sup> sacB</i>                                                                                                                              | This study      |
| pKNG101: $\Delta$ <i>luxS</i> ;Km <sup>R</sup>                   | Suicide plasmid carrying mutant locus $\Delta$ <i>luxS</i> ;Km <sup>R</sup> ;<br><i>Km<sup>R</sup> Sm<sup>R</sup> sacB</i>                                                                                                                              | This study      |
| pAL103                                                           | The bioluminescence reporter vector; <i>Tet<sup>R</sup></i> ;<br><i>luxR+luxI::luxCDABE</i> ; <i>Tet<sup>R</sup> p15A origin</i>                                                                                                                        | [9]             |
| pAL104                                                           | The negative control for vector pAL103; <i>Tet<sup>R</sup></i> ;<br><i>luxI::luxCDABE</i> ; <i>Tet<sup>R</sup> p15A origin</i>                                                                                                                          | [9]             |

| Primers                              |                                            |
|--------------------------------------|--------------------------------------------|
| Primer name                          | Primer sequence 5'–3'                      |
| Primers for mutagenesis <i>ΔexpI</i> |                                            |
| <b>upexpIF</b>                       | CGGCCGTCAGGAGATGTCTGAG                     |
| <b>dnexpIR</b>                       | ACAATTAGACTTAGGTACAGGTGTGG                 |
| <b>dnexpIKmF</b>                     | GCAGCTCCAGCCTACACGGAATTAGCGTAGTTGAACAAGG   |
| <b>upexpIKmR</b>                     | CCCATGTCAGCCGTGTCAGCAAGAGTTCACACACG        |
| <b>KmexpIF</b>                       | CGGCTGACATGGGGTGTAGGCTGGAGCTGCTTC          |
| <b>KmexpIR</b>                       | GTGTAGGCTGGAGCTGCACGGCTGACATGGGAATTAG      |
| <b>CheckexpIF</b>                    | CCTGCTGACCAATGCTGAACTG                     |
| <b>CheckexpIR</b>                    | ACATTCCCTGATGTTAGCCAATC                    |
| Primers for mutagenesis <i>ΔluxS</i> |                                            |
| <b>upluxSF</b>                       | CCTGCCTTATGCGACCTCTCTAC                    |
| <b>dnluxSR</b>                       | CGCCTACACACTCAGCCTCG                       |
| <b>dnluxSKmF</b>                     | CCATGTCAGCCGTTAAGACATATCTAGTTTATTGG        |
| <b>upluxSKmR</b>                     | CTCCAGCCTACACAATCAGTAACGGCATAATGCCTCC      |
| <b>KmluxSF</b>                       | CATTATGCCGTTACTGATTGTGTAGGCTGGAGCTGCTTC    |
| <b>KmluxSR</b>                       | CAATAAACTAGATATGTCTTAACGGCTGACATGGGAATTAGC |
| <b>CheckluxSF</b>                    | GCAGAAAGCGGGAAAAAGGC                       |
| <b>CheckluxSR</b>                    | CGCTGCTGACGGAGAACTGTTG                     |

- Bell, K.S.; Sebaihia, M.; Pritchard, L.; Holden, M.T.G.; Hyman, L.J.; Holeva, M.C.; Thomson, N.R.; Bentley, S.D.; Churcher, L.J.C.; Mungall, K.; et al. Genome sequence of the enterobacterial phytopathogen *Erwinia carotovora* subsp. *atroseptica* and characterization of virulence factors. *Proc. Natl. Acad. Sci.* **2004**, *101*, 11105–11110.
- Herrero, M.; de Lorenzo, V.; Timmis, K.N. Transposon vectors containing non-antibiotic resistance selection markers for cloning and stable chromosomal insertion of foreign genes in gram-negative bacteria. *J. Bacteriol.* **1990**, *172*, 6557–6567.
- Grinter, N.J. A broad-host-range cloning vector transposable to various replicons. *Gene* **1983**, *21*, 133–143.
- De Maayer, P.; Chan, W.Y.; Venter, S.N.; Toth, I.K.; Birch, P.R.J.; Joubert, F.; Coutinho, T.A. The genome sequence of *Pantoea ananatis* LMG20103, the causative agent of *Eucalyptus* blight and dieback. *J. Bacteriol.* **2010**, *192*, 2936–2937.
- Van der Wolf, J. M.; Nijhuis, E. H.; Kowalewska, M. J.; Saddler, G. S.; Parkinson, N.; Elphinstone, J. G.; Pritchard, L.; Toth, I. K.; Lojkowska, E.; Potrykus, M.; Waleron, M.; de Vos, P.; Cleenwerck, I.; Pirhonen, M.; Garland, L.; Hélias, V.; Pothier, J. F.; Pflüger, V.; Duffy, B.; Tsror, L.; Manulis, S. *Dickeya solani* sp. nov., a pectinolytic plant-pathogenic bacterium isolated from potato (*Solanum tuberosum*). *Int J Syst Evol Microbiol.* **2014**, *64*, 768–774.
- Vauterin, L.; Hoste, B.; Kersters, K.; Swings, J. Reclassification of *Xanthomonas*. *Int.J.Syst.Bacteriol.* **1995**, *45*, 472–489.
- Buell, C.R.; Joardar, V.; Lindeberg, M.; Selengut, J.; Paulsen, I.T.; Gwinn, M.L.; Dodson, R.J.; Deboy, R.T.; Durkin, A.S.; Kolonay, J.F.; Madupu, R.; Daugherty, S.; Brinkac, L.; Beanan, M.J.; Haft, D.H.; Nelson, W.C.; Davidsen, T.; Zafar, N.; Zhou, L.; Liu, J.; Yuan, Q.; Khouri, H.; Fedorova, N.; Tran, B.; Russell, D.; Berry, K.; Utterback, T.; Van Aken, S.E.; Feldblyum, T.V.; D'Ascenzo, M.; Deng, W.L.; Ramos, A.R.; Alfano, J.R.; Cartinhour, S.; Chatterjee, A.K.; Delaney, T.P.; Lazarowitz, S.G.; Martin, G.B.; Schneider, D.J.; Tang, X.; Bender, C.L.; White, O.; Fraser, C.M.; Collmer, A. The complete genome sequence of the *Arabidopsis* and tomato pathogen *Pseudomonas syringae* pv. *tomato* DC3000. *Proc. Natl. Acad. Sci. USA.* **2003**, *100*, 10181–10186.
- Ansorg, R.; Zappel, H.; Thomssen, R. Bedeutung des Nachweises antibakterieller Stoffe im Urin für die bakteriologische Diagnostik und die Kontrolle der Chemotherapie von Harnwegsinfektionen. *Zentralbl.Bakteriol.Parasitenkd.Orig.Reihe.* **1975**, *230*, 492–507.
- Lindsay, A.; Ahmer, B.M. Effect of *sdiA* on biosensor of N-acyl homoserine lactones. *J. Bacteriol.* **2005**, *187*, 5054–5058.
- Surette, M.G.; Bassler, B.L. Quorum sensing in *Escherichia coli* and *Salmonella typhimurium*. *PNAS.* **1998**, *95*, 7046–7050.
- Datsenko, K.A.; Wanner, B.L. One-step inactivation of chromosomal genes in *Escherichia coli* K-12 using PCR products. *Proc. Natl. Acad. Sci.* **2000**, *97*, 6640–6645.
- Kaniga, K.; Delor, I.; Cornelis, G.R. A wide-host-range suicide vector for improving reverse genetics in gram-negative bacteria: Inactivation of the *blaA* gene of *Yersinia enterocolitica*. *Gene* **1991**, *109*, 137–141.
